# Supplementary material
Source: HighWire-hosted journal article supplement (http://jnnp.bmjjournals.com/highwire/filestream/184867/field_highwire_adjunct_files/0/787754webonlyapp.pdf)
Supplement: 787754webonlyapp.pdf [file 787754webonlyapp.pdf]

## SUPPLEMENTARY DATA

### Appendix 1. Primers used to sequence the 12 exons of *PGRN*

|                 | Sequence              | Product size |
|-----------------|-----------------------|--------------|
| Exon 1 Forward  | AGGTGTTGAGAAGGCTCAGG  | 485          |
| Exon 1 Reverse  | CGGTAAAGATGCAGGAGTGG  |              |
| Exon 2 Forward  | GTCCCCTTCTGGTGAGTGC   | 458          |
| Exon 2 Reverse  | GATCTTTGGAAGCAGGATCG  |              |
| Exon 3 Forward  | ACACTGAGCAGGCATCTGG   | 512          |
| Exon 3 Reverse  | CTGGAGTCTTGCACTTTCTCC |              |
| Exon 4 Forward  | AGGGAGGGACTGGATTGTG   | 550          |
| Exon 4 Reverse  | TGCTCTCCCACCTCCTCAC   |              |
| Exon 5 Forward  | GTTATGGTCGATGGCTCCTG  | 466          |
| Exon 5 Reverse  | CAGCTCACAGCAGGTAGAACC |              |
| Exon 6 Forward  | TGCCCAGAGGACTAACAGG   | 448          |
| Exon 6 Reverse  | CAGGCTCAGTAGCACACAGG  |              |
| Exon 7 Forward  | CTGGCTGATGCAGGGTTC    | 452          |
| Exon 7 Reverse  | CTGTGAGGGAAGCAGAGAGG  |              |
| Exon 8 Forward  | CCCCTTTCCTCCCTTTTAGG  | 388          |
| Exon 8 Reverse  | CGGGACAGCAGTGTATGTGG  |              |
| Exon 9 Forward  | GCTGCTGCCCTTTTACCC    | 498          |
| Exon 9 Reverse  | CCGCCTCTCCTGCTTACAG   |              |
| Exon 10 Forward | CCTCCGCATAGCCCATAG    | 498          |
| Exon 10 Reverse | ATCCTCGCAGCACACAGC    |              |
| Exon 11 Forward | AGACATCGGCTGTGACCAG   | 488          |
| Exon 11 Reverse | GCGAGAGGGTTGGACGAG    |              |
| Exon 12 Forward | ACCTGCTGCCGAGACAAC    | 454          |
| Exon 12 Reverse | CCACAACCCCTTCTGAC     |              |

### Appendix 2. *PGRN* sequence variants found in both ALS cases and normal control samples (NM\_002087.2)

| Variant                     | Number of ALS/ALS-FTD cases with variant | Control chromosomes (number /total number screened) |
|-----------------------------|------------------------------------------|-----------------------------------------------------|
| <b>R19W (c.274C&gt;T)</b>   | 1                                        | 13/450                                              |
| <b>D33D (c.318C&gt;T)</b>   | 1                                        | 2/268                                               |
| <b>IVS2+7 G&gt;A</b>        | 11                                       | 1/478                                               |
| <b>IVS3-47insAGTC</b>       | 174*                                     | 62/231                                              |
| <b>V141I (c.640G&gt;A)</b>  | 1                                        | 2/510                                               |
| <b>IVS7+7 G&gt;A</b>        | 40 <sup>†</sup>                          | 28/400                                              |
| <b>A324T (c.1189G&gt;A)</b> | 3                                        | 3/367                                               |
| <b>R433W (c.1516C&gt;T)</b> | 3                                        | 5/184                                               |
| <b>P458L (c.1592C&gt;T)</b> | 1                                        | 25/959                                              |
| <b>R556C (c.1885C&gt;T)</b> | 1                                        | 1/862                                               |

\*41 homozygous cases, 133 heterozygous cases

† 2 homozygous cases, 38 heterozygous cases

**Clinical description of case ND10418**

This non-Hispanic, Caucasian right-handed male patient presented at 67 years of age with leg weakness that progressed to involve all four limbs. He met the criteria for probable ALS by El Escorial criteria. He was not demented and there was no known family history of ALS, dementia or Parkinson Disease. He was 69 years of age at the time of sampling without obvious bulbar involvement.

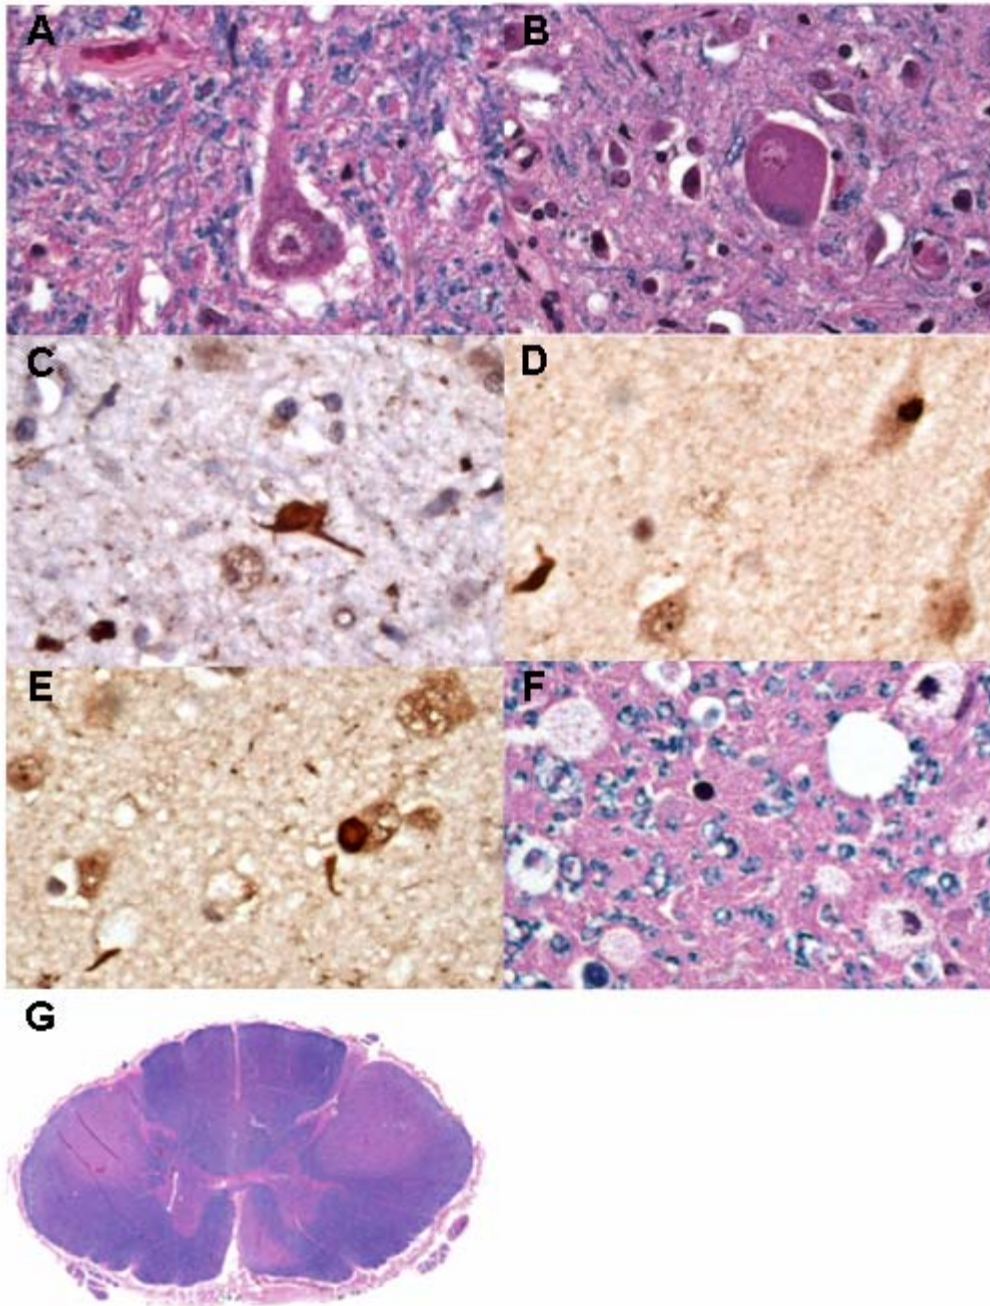

**Figure 1. Histology of case T-51 carrying S120Y mutation.** (A) Luxol fast blue counterstained with hematoxylin and eosin (LHE) stain of hypoglossal nucleus showing a neuron containing a cytoplasmic, eosinophilic inclusion (Bunina body). In addition, neuronal density is decreased and neuropil is traversed by glial fibrillary processes (Original magnification 630X); (B) LHE stain of motor cortex (Brodmann area 4) showing

an atrophic, centrally located Betz cells with scattered, shrunken neurons (400X); (C) Sixth cortical layer of motor cortex (BA4) with neuropil ubiquitinated aggregates (630X); (D) Fifth cortical layer of cingulate gyrus (BA24) showing two neurons with ubiquitinated nuclear inclusions (round compact on the upper right, two punctate on the bottom/center) and comma-shaped cytoplasmic aggregates on the lower left (630X); (E) Fifth cortical layer of superior frontal gyrus (BA 9) showing a neuron with a large, globular ubiquitinated, cytoplasmic inclusion (630X); (F) LHE stain of the cervical cord showing marked myelin loss of the corticospinal tract; (G) LHE stain of cervical corticospinal tract showing marked myelin loss with scattered macrophages (630X).
